# Supplementary material for: Enhancing the potential production of bioethanol with bamboo by γ-valerolactone/water pretreatment
Source: Royal Society of Chemistry journal article supplement (doi:10.1039/d2ra02421g), 2022-01-01
Supplement: d2ra02421g1.pdf [file d2ra02421g1.pdf]

Table S1. The chemical composition of pretreated bamboo substrates and untreated bamboo powder.

| Pretreatment conditions |                 |      | The content of three components (%) |           |           |            |            | Substrate recovery | Glucan     | Lignin     | Araban and xylan |
|-------------------------|-----------------|------|-------------------------------------|-----------|-----------|------------|------------|--------------------|------------|------------|------------------|
| GVL:H <sub>2</sub> O    | Temperatur<br>e | Time | AIL                                 | ASL       | Araban    | Glucan     | Xylan      | yield              | retention  | removal    | removal          |
|                         | (°C)            | (h)  |                                     |           |           |            |            | (%)                | (%)        | (%)        | (%)              |
| Untreated bamboo        |                 |      | 23.73±0.42                          | 0.47±0.06 | 2.48±0.20 | 48.22±0.56 | 22.66±0.47 | -                  | -          | -          | -                |
| 3:7                     |                 |      | 20.98±0.32                          | 0.28±0.01 | ND        | 67.48±1.01 | 10.22±0.72 | 62.52±0.78         | 87.51±2.36 | 37.48±1.52 | 74.55±2.07       |
| 5:5                     |                 |      | 13.70±0.56                          | 0.28±0.03 | ND        | 74.64±1.36 | 15.31±0.77 | 55.95±0.36         | 84.28±1.98 | 67.69±1.52 | 65.91±1.93       |
| 7:3                     | 120             | 2    | 7.77±0.59                           | 0.18±0.02 | ND        | 78.16±0.59 | 14.25±0.14 | 52.77±1.38         | 85.52±1.89 | 82.69±0.14 | 70.10±0.81       |
| 8:2                     |                 |      | 6.44±0.09                           | 0.15±0.05 | ND        | 83.88±1.64 | 12.25±0.79 | 47.44±0.23         | 82.53±1.39 | 87.12±0.14 | 76.86±1.61       |
| 9:1                     |                 |      | 8.16±1.56                           | 0.22±0.03 | ND        | 81.49±2.20 | 11.27±1.21 | 51.17±1.70         | 86.42±1.75 | 82.34±3.86 | 76.98±3.21       |
| 8:2                     |                 | 2    | 2.44±0.28                           | 0.09±0.01 | ND        | 94.94±1.29 | 3.10±0.35  | 40.73±0.34         | 80.20±1.50 | 95.80±0.51 | 94.97±0.61       |
| 8:2                     | 140             | 3    | 1.89±0.28                           | 0.06±0.02 | ND        | 95.31±0.92 | 2.40±0.29  | 33.82±0.28         | 66.85±0.99 | 97.30±0.34 | 96.77±0.40       |
| 8:2                     |                 | 4    | 1.52±0.11                           | 0.05±0.01 | ND        | 97.87±2.63 | 1.37±0.95  | 27.79±0.24         | 56.39±1.07 | 98.21±0.15 | 98.52±1.06       |
| 8:2                     | 160             | 2    | 4.94±0.31                           | 0.19±0.03 | ND        | 96.55±0.70 | ND         | 9.01±0.61          | 18.08±1.34 | 98.12±0.24 | 76.98±3.21       |

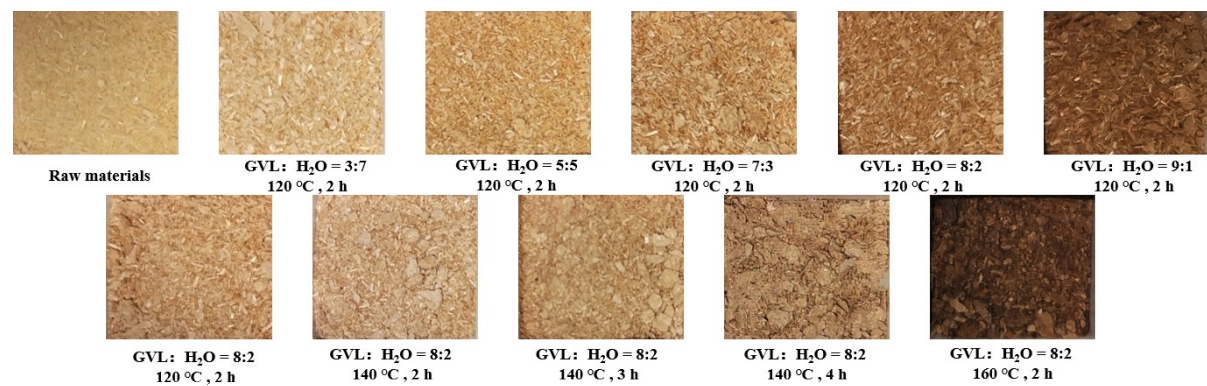

Fig. S1. The color of various bamboo powder before and after pretreatment.
